# Supplementary material
Source: MDPI journal article supplement (https://www.mdpi.com/2075-163X/11/7/756)
Supplement: s1 [file s1]

**Table S1:** Analyses of NIST 612 reference glass. External standardization was done by standard-sample-standard bracketing with ten measurements of the samples bracketed by two analyses of NIST 612 reference glass.

| Element | 1     | 2     | 3     | 4     | 5     | 6     | Average | $\pm 2\sigma$ % |
|---------|-------|-------|-------|-------|-------|-------|---------|-----------------|
| La      | 35.23 | 36.23 | 35.59 | 36.27 | 34.65 | 36.77 | 35.79   | 4.36            |
| Ce      | 37.31 | 38.52 | 38.77 | 39.66 | 37.46 | 38.40 | 38.35   | 4.54            |
| Pr      | 36.68 | 37.45 | 37.15 | 37.50 | 37.63 | 36.57 | 37.16   | 2.41            |
| Nd      | 35.33 | 34.95 | 34.41 | 36.83 | 36.01 | 34.31 | 35.31   | 5.52            |
| Sm      | 36.07 | 37.65 | 36.18 | 36.94 | 36.21 | 37.38 | 36.74   | 3.71            |
| Eu      | 34.81 | 34.52 | 33.80 | 34.50 | 33.91 | 35.30 | 34.47   | 3.25            |
| Gd      | 37.48 | 38.38 | 34.67 | 36.36 | 37.93 | 37.60 | 37.07   | 7.31            |
| Tb      | 35.51 | 36.60 | 35.60 | 35.75 | 36.57 | 35.54 | 35.93   | 2.87            |
| Dy      | 35.40 | 37.41 | 34.25 | 36.69 | 36.41 | 36.16 | 36.05   | 6.11            |
| Ho      | 37.66 | 38.18 | 37.24 | 38.51 | 38.60 | 37.25 | 37.91   | 3.21            |
| Er      | 37.39 | 37.52 | 36.00 | 39.46 | 37.38 | 37.39 | 37.52   | 5.90            |
| Tm      | 37.68 | 37.50 | 36.78 | 38.50 | 37.66 | 37.45 | 37.60   | 2.94            |
| Yb      | 39.42 | 40.14 | 39.20 | 41.73 | 39.96 | 39.56 | 40.00   | 4.57            |
| Lu      | 37.77 | 37.83 | 37.17 | 38.10 | 37.96 | 37.59 | 37.74   | 1.73            |
| Sc      | 40.12 | 41.72 | 40.36 | 43.34 | 40.71 | 41.02 | 41.21   | 5.74            |
| V       | 38.31 | 38.86 | 39.95 | 41.09 | 37.82 | 39.40 | 39.24   | 6.02            |
| Mn      | 37.67 | 38.49 | 38.61 | 39.74 | 38.36 | 37.88 | 38.46   | 3.77            |
| Co      | 34.74 | 35.72 | 34.81 | 36.09 | 34.31 | 36.07 | 35.29   | 4.34            |
| Ni      | 36.13 | 40.02 | 38.26 | 40.59 | 37.73 | 38.25 | 38.50   | 8.38            |
| Zn      | 35.90 | 39.27 | 37.40 | 39.91 | 41.27 | 34.59 | 38.06   | 13.36           |
| Sr      | 76.69 | 77.42 | 74.88 | 74.38 | 75.93 | 77.90 | 76.20   | 3.66            |
| Y       | 38.73 | 39.24 | 37.21 | 36.90 | 38.05 | 39.70 | 38.31   | 5.83            |
| Zr      | 35.23 | 37.47 | 34.20 | 37.20 | 36.12 | 36.29 | 36.09   | 6.78            |
| Nb      | 37.12 | 38.56 | 38.31 | 38.57 | 38.17 | 37.58 | 38.05   | 3.06            |
| Hf      | 33.34 | 35.52 | 34.54 | 36.59 | 34.54 | 34.29 | 34.80   | 6.42            |
| Ta      | 38.90 | 40.56 | 38.92 | 41.23 | 39.27 | 40.05 | 39.82   | 4.79            |
| Th      | 36.46 | 37.75 | 37.08 | 37.94 | 37.22 | 36.99 | 37.24   | 2.89            |
| U       | 35.57 | 37.77 | 38.16 | 37.82 | 37.03 | 36.41 | 37.13   | 5.34            |
